# Supplementary material for: Temperature and Humidity Regulate Sporulation of Corynespora cassiicola That Is Associated with Pathogenicity in Cucumber (Cucumis sativus L.)
Source: MDPI journal article supplement (doi:10.3390/biology11111675), 2022-11-18
Supplement: s1 [file s1]

**Table S1.** Analysis of variance considering the effects of temperature, moisture and their interaction on sporulation of *Corynespora cassiicola*.

| Sporulation      | Substrate          | Percent variance explained |          |             |
|------------------|--------------------|----------------------------|----------|-------------|
|                  |                    | Temperature                | Moisture | Interaction |
| Spore production | PDA                | 81.62%                     | 9.15%    | 8.84%       |
|                  | CEA                | 66.48%                     | 20.10%   | 12.18%      |
|                  | detached leaves    | 41.08%                     | 36.78%   | 21.77%      |
|                  | cucumber seedlings | 36.78%                     | 43.65%   | 19.48%      |
| Spore length     | PDA                | N.S.                       | N.S.     | N.S.        |
|                  | CEA                | 9.56%                      | 84.52%   | 5.70%       |
|                  | detached leaves    | 7.62%                      | 84.86%   | 6.96%       |
|                  | cucumber seedlings | 7.62%                      | 83.09%   | 7.41%       |
| Spore width      | PDA                | N.S.                       | N.S.     | N.S.        |
|                  | CEA                | 19.35%                     | 44.72%   | 1.54%       |
|                  | detached leaves    | 14.88%                     | 73.10%   | 5.57%       |
|                  | cucumber seedlings | 17.13%                     | 66.67%   | 7.18%       |

This table shows how much temperature, moisture and their interaction explain the total variance in spore production, length and width of *C. cassiicola* in vitro and in vivo.

PDA, potato dextrose agar; CEA, cucumber-leaf extract agar.

The percentage figures are calculated from the type III sum of squares in ANOVA table gotten through SPSS (version 24).

N.S. (not significant) means that no significant differences were observed among different levels of temperature and moisture.

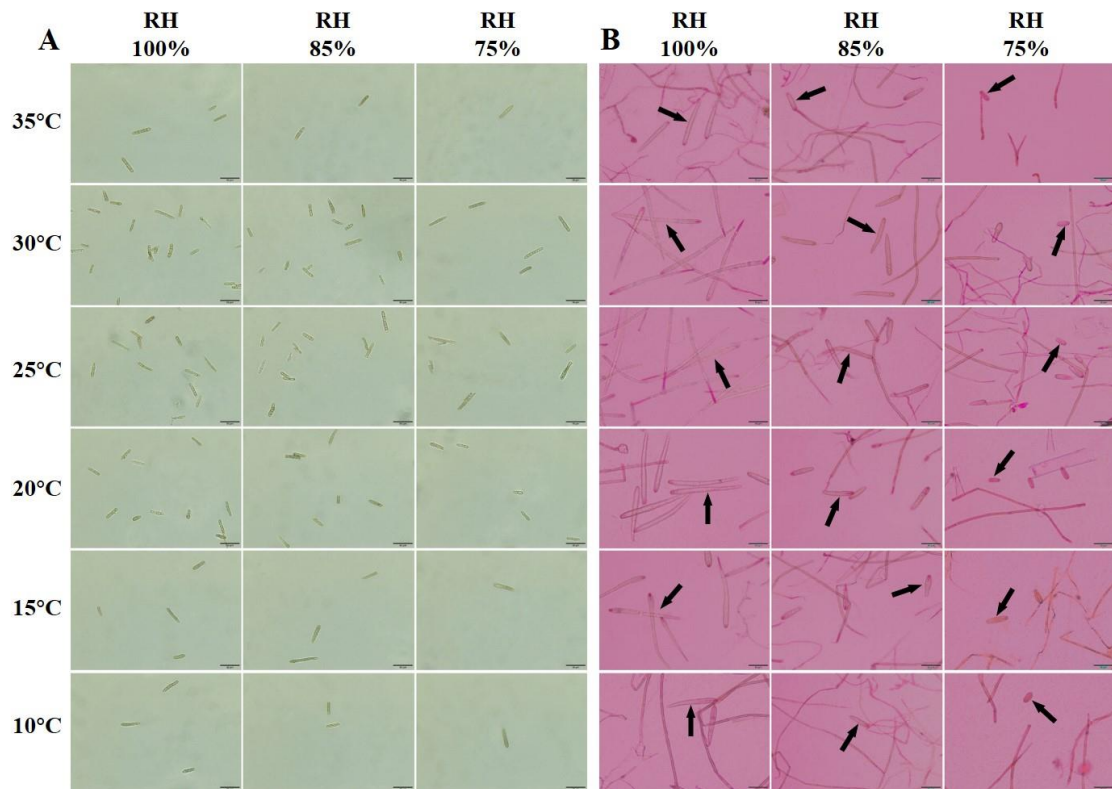

**Figure S1.** Morphological characteristics of *Corynespora cassiicola* on potato dextrose agar (PDA) (A) at 12 days after incubation (DAI) and cucumber detached leaves (B) at 12 hours after incubation (HAI), which were assessed at six temperatures (10, 15, 20, 25, 30, and 35 °C) with three moisture levels (75%, 85%, and 100% RH) per temperature. Black arrowheads represented the spores (Scale bars, 50  $\mu$ m).

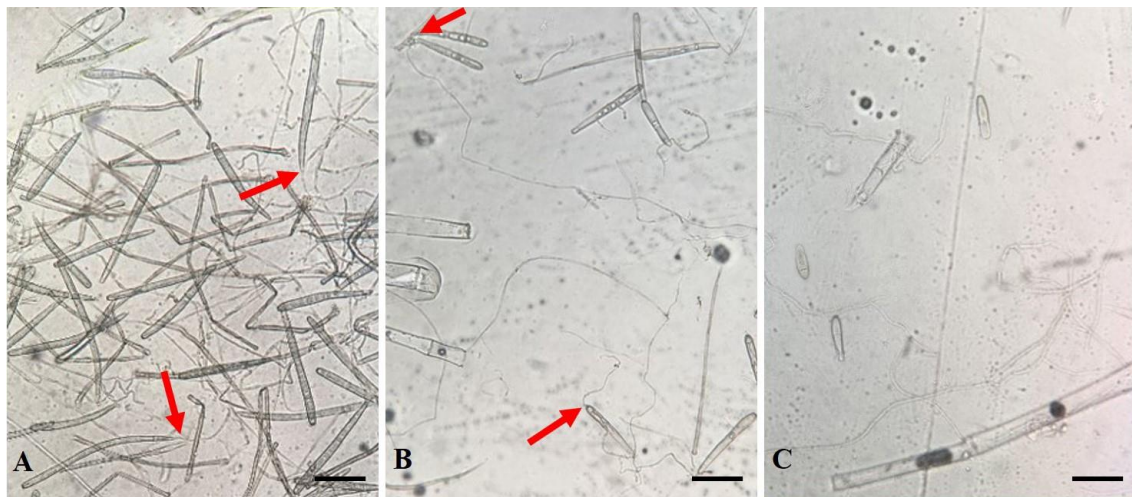

**Figure S2.** Germination of different size spores. (A) Large spores germinated and produced invasive hyphae; (B) Medium spores germinated and produced invasive hyphae; (C) Small spores did not germinate. Red arrowheads indicated the ends at which spores germinated (Scale bars, 50  $\mu$ m).
